# Supplementary material
Source: PubMed Central journal article supplement (PMC9295019)

## Supplemental Online Content

Miller PE, Bromfield SG, Ma Q, et al. Clinical outcomes and cost associated with an intravascular microaxial left ventricular assist device vs intra-aortic balloon pump in patients presenting with acute myocardial infarction complicated by cardiogenic shock. *JAMA Intern Med*. Published online July 18, 2022. doi:10.1001/jamainternmed.2022.2735

**eTable 1.** Administrative coding used to identify procedures, outcomes, and diagnoses

**eTable 2.** Baseline characteristics of the overall population of patients undergoing percutaneous coronary intervention for acute myocardial infarction complicated by cardiogenic shock receiving an intra-aortic balloon pump or intravascular left ventricular assist device

**eTable 3.** Healthcare utilization preceding index hospitalization for acute myocardial infarction complicated by cardiogenic shock

**eTable 4.** Clinical outcomes at 30-days and 1-year in the propensity matched cohort

**eTable 5.** Mean total medical costs for patients undergoing percutaneous coronary intervention for acute myocardial infarction complicated by cardiogenic shock in the propensity-matched cohort

**eTable 6.** Sensitivity analyses including our propensity score as a covariate, including patients also receiving extracorporeal membrane oxygenation, and exclusion of patients who had cardiac arrest

**eTable 7.** Landmark analysis for patients who survived their index admission up to 1-year in the propensity matched cohort

**eTable 8.** Falsification endpoints among propensity-matched patients receiving an intravascular left ventricular assist device versus intra-aortic balloon pump

**eFigure.** Kaplan-Meier curves for 1-year bleeding (A), renal replacement therapy (B), stroke (C) and repeat revascularization (D) among propensity-matched patients receiving an intravascular left ventricular assist device versus intra-aortic balloon pump

This supplemental material has been provided by the authors to give readers additional information about their work.

**eTable 1.** Administrative coding used to identify procedures, outcomes, and diagnoses

|                    |                                                                                                                                                                                                                                                                                                                                                                                                                                                                                                                                                                                                                                                                                                                                                                                                                                                                                                                                                                                          |
|--------------------|------------------------------------------------------------------------------------------------------------------------------------------------------------------------------------------------------------------------------------------------------------------------------------------------------------------------------------------------------------------------------------------------------------------------------------------------------------------------------------------------------------------------------------------------------------------------------------------------------------------------------------------------------------------------------------------------------------------------------------------------------------------------------------------------------------------------------------------------------------------------------------------------------------------------------------------------------------------------------------------|
| IABP               |                                                                                                                                                                                                                                                                                                                                                                                                                                                                                                                                                                                                                                                                                                                                                                                                                                                                                                                                                                                          |
| CPT                | 33967                                                                                                                                                                                                                                                                                                                                                                                                                                                                                                                                                                                                                                                                                                                                                                                                                                                                                                                                                                                    |
| ICD-9              | 37.61                                                                                                                                                                                                                                                                                                                                                                                                                                                                                                                                                                                                                                                                                                                                                                                                                                                                                                                                                                                    |
| ICD-10             | 5A02110, 5A02210                                                                                                                                                                                                                                                                                                                                                                                                                                                                                                                                                                                                                                                                                                                                                                                                                                                                                                                                                                         |
| Intravascular LVAD |                                                                                                                                                                                                                                                                                                                                                                                                                                                                                                                                                                                                                                                                                                                                                                                                                                                                                                                                                                                          |
| CPT                | 33990, 33991                                                                                                                                                                                                                                                                                                                                                                                                                                                                                                                                                                                                                                                                                                                                                                                                                                                                                                                                                                             |
| ICD-9              | 37.68                                                                                                                                                                                                                                                                                                                                                                                                                                                                                                                                                                                                                                                                                                                                                                                                                                                                                                                                                                                    |
| ICD-10             | 02HA3RJ, 02HA3RS, 02HA3RZ, 02HL3DZ, 5A0211D, 5A0221D                                                                                                                                                                                                                                                                                                                                                                                                                                                                                                                                                                                                                                                                                                                                                                                                                                                                                                                                     |
| AMI                |                                                                                                                                                                                                                                                                                                                                                                                                                                                                                                                                                                                                                                                                                                                                                                                                                                                                                                                                                                                          |
| ICD-9              | 410.01, 410.11, 410.21, 410.31, 410.41, 410.51, 410.61, 410.71, 410.81, 410.91                                                                                                                                                                                                                                                                                                                                                                                                                                                                                                                                                                                                                                                                                                                                                                                                                                                                                                           |
| ICD-10             | I21.01, I21.02, I21.09, I21.11, I21.19, I21.21, I21.29, I21.3, I21.4, I21.9, I21.A1, I21.A9, I22.0, I22.1, I22.2, I22.8, I22.9                                                                                                                                                                                                                                                                                                                                                                                                                                                                                                                                                                                                                                                                                                                                                                                                                                                           |
| PCI                |                                                                                                                                                                                                                                                                                                                                                                                                                                                                                                                                                                                                                                                                                                                                                                                                                                                                                                                                                                                          |
| CPT/HCPCS          | 92920, 92921, 92924, 92925, 92928, 92929, 92933, 92934, 92937, 92938, 92941, 92943, 92944, 92980, 92981, 92982, 92984, 92995, 92996, C9600, C9601, C9602, C9603, C9604, C9605, C9606, C9607, C9608, G0290, G0291                                                                                                                                                                                                                                                                                                                                                                                                                                                                                                                                                                                                                                                                                                                                                                         |
| ICD-9              | 00.66, 17.55, 36.01, 36.02, 36.05, 36.06, 36.07, 36.09                                                                                                                                                                                                                                                                                                                                                                                                                                                                                                                                                                                                                                                                                                                                                                                                                                                                                                                                   |
| ICD-10             | 0270046, 027004Z, 02700D6, 02700DZ, 02700T6, 02700TZ, 02700Z6, 02700ZZ, 0270346, 027034Z, 02703D6, 02703DZ, 02703T6, 02703TZ, 02703Z6, 02703ZZ, 0270446, 027044Z, 02704D6, 02704DZ, 02704T6, 02704TZ, 02704Z6, 02704ZZ, 0271046, 027104Z, 02710D6, 02710DZ, 02710T6, 02710TZ, 02710Z6, 02710ZZ, 0271346, 027134Z, 02713D6, 02713DZ, 02713T6, 02713TZ, 02713Z6, 02713ZZ, 0271446, 027144Z, 02714D6, 02714DZ, 02714T6, 02714TZ, 02714Z6, 02714ZZ, 0272046, 027204Z, 02720D6, 02720DZ, 02720T6, 02720TZ, 02720Z6, 02720ZZ, 0272346, 027234Z, 02723D6, 02723DZ, 02723T6, 02723TZ, 02723Z6, 02723ZZ, 0272446, 027244Z, 02724D6, 02724DZ, 02724T6, 02724TZ, 02724Z6, 02724ZZ, 0273046, 027304Z, 02730D6, 02730DZ, 02730T6, 02730TZ, 02730Z6, 02730ZZ, 0273346, 027334Z, 02733D6, 02733DZ, 02733T6, 02733TZ, 02733Z6, 02733ZZ, 0273446, 027344Z, 02734D6, 02734DZ, 02734T6, 02734TZ, 02734Z6, 02734ZZ, 02C03ZZ, 02C04ZZ, 02C13ZZ, 02C14ZZ, 02C23ZZ, 02C24ZZ, 02C33ZZ, 02C34ZZ, X2C0361, X2C1361 |
| ECMO               |                                                                                                                                                                                                                                                                                                                                                                                                                                                                                                                                                                                                                                                                                                                                                                                                                                                                                                                                                                                          |
| CPT                | 33947, 33948, 33949, 36822, 33960, 33961                                                                                                                                                                                                                                                                                                                                                                                                                                                                                                                                                                                                                                                                                                                                                                                                                                                                                                                                                 |
| ICD-9              | 39.65                                                                                                                                                                                                                                                                                                                                                                                                                                                                                                                                                                                                                                                                                                                                                                                                                                                                                                                                                                                    |
| ICD-10             | 5A1522F, 5A1522G, 5A1522H                                                                                                                                                                                                                                                                                                                                                                                                                                                                                                                                                                                                                                                                                                                                                                                                                                                                                                                                                                |
| Cardiogenic shock  |                                                                                                                                                                                                                                                                                                                                                                                                                                                                                                                                                                                                                                                                                                                                                                                                                                                                                                                                                                                          |
| ICD-9              | 785.51                                                                                                                                                                                                                                                                                                                                                                                                                                                                                                                                                                                                                                                                                                                                                                                                                                                                                                                                                                                   |
| ICD-10             | R57.0                                                                                                                                                                                                                                                                                                                                                                                                                                                                                                                                                                                                                                                                                                                                                                                                                                                                                                                                                                                    |
| Blood transfusion  |                                                                                                                                                                                                                                                                                                                                                                                                                                                                                                                                                                                                                                                                                                                                                                                                                                                                                                                                                                                          |

|                   |                                                                                                                                                                                                                                                                                                                                                                                                                                                                                                                                                                          |
|-------------------|--------------------------------------------------------------------------------------------------------------------------------------------------------------------------------------------------------------------------------------------------------------------------------------------------------------------------------------------------------------------------------------------------------------------------------------------------------------------------------------------------------------------------------------------------------------------------|
| CPT/HCPCS         | P9010, P9011, P9039, P9021, P9057, P9038, P9058, P9040, P9022, P9051, P9054, P9056                                                                                                                                                                                                                                                                                                                                                                                                                                                                                       |
| ICD-9             | 99.03,99.04                                                                                                                                                                                                                                                                                                                                                                                                                                                                                                                                                              |
| ICD-10            | 30233H1, 30233N1, 30243H1, 30243N1                                                                                                                                                                                                                                                                                                                                                                                                                                                                                                                                       |
| Major bleeding    |                                                                                                                                                                                                                                                                                                                                                                                                                                                                                                                                                                          |
| ICD-9             | 430,431,432,578, 280.0, 285.1, 363.6, 423.0, 432.X, 455.2, 455.5, 455.8, 456.0, 459.0, 530.7, 531.0, 531.2, 531.4, 531.6, 532.0, 532.2, 532.4, 532.6, 533.0, 533.2, 533.4, 533.6, 534.0, 534.2, 534.4, 534.6, 569.3, 578.0, 578.1, 578.9, 599.7, 784.7, 784.8, 786.3, 852.0, 852.2, 852.4, 853.0, 372.72, 456.20, 530.21, 530.82, 531.0, 531.2, 531.4, 531.6, 532.0, 532.2, 532.4, 532.6, 533.0, 533.2, 533.4, 533.6, 534.0, 534.2, 534.4, 534.6, 535.x1, 537.83, 537.84, 562.02, 562.03, 562.12, 562.13, 568.81, 569.85, 569.86, 719.1x, 852.0x, 852.2x, 852.4x, 853.0x |
| ICD-10            | D50.0, D62, H11.33, I31.2, I60.%, I61.%, I62.%, I69.0%, I69.1%, I69.2%, I84.1%, I85.01, I85.11, K22.11, K22.6, K25.0, K25.2, K25.4, K25.6, K25.7, K26.0, K26.2, K26.4, K26.6, K27.0, K27.2, K27.4, K27.6, K28.0, K28.2, K28.4, K28.6, K29.%1, K31.811, K31.82, K55.21, K57.%1, K57.%3, K62.5, K66.1, K92.0, K92.1, K92.2, M25.00, M25.0%9, M25.073, M25.076, M25.08, R04.0, R04.1, R58, S06.34%, S06.35%, S06.36%, S06.4%A, S06.5%A, S06.6%A                                                                                                                             |
| RRT               |                                                                                                                                                                                                                                                                                                                                                                                                                                                                                                                                                                          |
| CPT/HCPCS         | G8714, G8715, G8713, G8717, G8718, G8720, G8956, S9335, 90937, 90935, 4054F, 4052F, 4053F, 99512                                                                                                                                                                                                                                                                                                                                                                                                                                                                         |
| ICD-9             | 39.95                                                                                                                                                                                                                                                                                                                                                                                                                                                                                                                                                                    |
| ICD-10            | 5A1D00Z, 5A1D60Z, 5A1D70Z, 5A1D80Z, 5A1D90Z                                                                                                                                                                                                                                                                                                                                                                                                                                                                                                                              |
| Stroke            |                                                                                                                                                                                                                                                                                                                                                                                                                                                                                                                                                                          |
| ICD-9             | 433.x1, 434.x1, 433.x0, 434.x0, 435.x                                                                                                                                                                                                                                                                                                                                                                                                                                                                                                                                    |
| ICD-10            | I63%, G45.%                                                                                                                                                                                                                                                                                                                                                                                                                                                                                                                                                              |
| Hypertension      |                                                                                                                                                                                                                                                                                                                                                                                                                                                                                                                                                                          |
| ICD-9             | 401.xx, 402.xx, 403.xx, 404.xx                                                                                                                                                                                                                                                                                                                                                                                                                                                                                                                                           |
| ICD-10            | I10.%, I11.%, I12.%, I13.%, H35.03%, I67.4                                                                                                                                                                                                                                                                                                                                                                                                                                                                                                                               |
| Dyslipidemia      |                                                                                                                                                                                                                                                                                                                                                                                                                                                                                                                                                                          |
| ICD-9             | 272.xx                                                                                                                                                                                                                                                                                                                                                                                                                                                                                                                                                                   |
| ICD-10            | E78.%                                                                                                                                                                                                                                                                                                                                                                                                                                                                                                                                                                    |
| Diabetes mellitus |                                                                                                                                                                                                                                                                                                                                                                                                                                                                                                                                                                          |
| ICD-9             | 250.x1, 250.x3, 250.x0, 250.x2                                                                                                                                                                                                                                                                                                                                                                                                                                                                                                                                           |
| ICD-10            | E10.%, E11.%                                                                                                                                                                                                                                                                                                                                                                                                                                                                                                                                                             |
| Tobacco use       |                                                                                                                                                                                                                                                                                                                                                                                                                                                                                                                                                                          |
| CPT/HCPCS         | 99406, 99407, 1034F, 4004F,4001F, G0436, G0437, G9016, S9075, S9453, S4995, G9276, G9458                                                                                                                                                                                                                                                                                                                                                                                                                                                                                 |
| ICD-9             | V15.82, 305.1                                                                                                                                                                                                                                                                                                                                                                                                                                                                                                                                                            |
| ICD-10            | F17.%, Z87.891, Z72.0                                                                                                                                                                                                                                                                                                                                                                                                                                                                                                                                                    |
| Obesity           |                                                                                                                                                                                                                                                                                                                                                                                                                                                                                                                                                                          |
| ICD-9             | 278.0x                                                                                                                                                                                                                                                                                                                                                                                                                                                                                                                                                                   |

|                      |                                                                                                                                                                                                                        |
|----------------------|------------------------------------------------------------------------------------------------------------------------------------------------------------------------------------------------------------------------|
| ICD-10               | E66.%                                                                                                                                                                                                                  |
| Heart failure        |                                                                                                                                                                                                                        |
| ICD-9                | 398.91, 402.01, 402.11, 402.91, 404.01, 404.03, 404.11, 404.13, 404.91, 404.93, 428.0, 428.1, 428.20, 428.21, 428.22, 428.23, 428.30, 428.31, 428.32, 428.33, 428.40, 428.41, 428.42, 428.43, 428.9                    |
| ICD-10               | I09.81, I11.0, I13.0, I13.2, I50.1, I50.20, I50.21, I50.22, I50.23, I50.30, I50.31, I50.32, I50.33, I50.40, I50.41, I50.42, I50.43, I50.810, I50.811, I50.812, I50.813, I50.814, I50.82, I50.83, I50.84, I50.89, I50.9 |
| Atrial fibrillation  |                                                                                                                                                                                                                        |
| ICD-9                | 427.41, 427.42, 427.5                                                                                                                                                                                                  |
| ICD-10               | I48.%                                                                                                                                                                                                                  |
| CVD                  |                                                                                                                                                                                                                        |
| ICD-9                | 430.xx-438.xx                                                                                                                                                                                                          |
| ICD-10               | G45.%, G46.%, I60.%-I67.%, I69.%                                                                                                                                                                                       |
| PVD                  |                                                                                                                                                                                                                        |
| ICD-9                | 093.0, 437.3, 440.xx, 441.xx, 443.xx, 447.1, 557.1, 557.9, V43.4                                                                                                                                                       |
| ICD-10               | I70.%, I71.%, I73.%, I77.1, I79.0, K55.%, Z95.8%, Z95.9                                                                                                                                                                |
| Chronic lung disease |                                                                                                                                                                                                                        |
| ICD-9                | 490.xx, 491.xx, 492.xx, 493.xx, 494.0, 494.1, 495.xx, 496                                                                                                                                                              |
| ICD-10               | J41.1, J41.8, J42.%, J43.%, J60.%, J61.%, J62.%, J63.%, J64.%, J65.%, J66.%, J70.1, J70.3, J84.%                                                                                                                       |
| Cancer               |                                                                                                                                                                                                                        |
| ICD-9                | 141.xx-165.xx, 170.xx-172.xx, 174.xx-176.xx, 179.xx-195.xx, 200.xx-208.xx                                                                                                                                              |
| ICD-10               | C00.%-C26.%, C30.%-C34.%, C37.%-C41.%, C43, C45.%-C58.%, C60.%-C76.%, C7A.%, C7B.%, C81.%-C85.%, C88.%, C90.%-C97.%                                                                                                    |
| CKD                  |                                                                                                                                                                                                                        |
| ICD-9                | 403.xx, 404.00, 404.01, 404.02, 404.03, 404.10, 404.11, 585.x                                                                                                                                                          |
| ICD-10               | D63.1, E08.22, E09.22, E10.22, E11.22, E13.22, I12.0, I12.9, I13.0, I131, I13.11, I13.2, N18.%, Z99.2                                                                                                                  |

IABP = Intra-aortic balloon pump; CPT = Current procedural terminology; ICD = International classification of diseases; LVAD = Left ventricular assist device; AMI = Acute myocardial infarction; PCI = Percutaneous coronary intervention; HCPCS = Healthcare common procedure coding system; ECMO = Extracorporeal membrane oxygenation; RRT = Renal replacement therapy; CVD = Cerebrovascular disease; PVD = Peripheral vascular disease; CKD = Chronic kidney disease

**eTable 2.** Baseline characteristics of the overall population of patients undergoing percutaneous coronary intervention for acute myocardial infarction complicated by cardiogenic shock receiving an intra-aortic balloon pump or intravascular left ventricular assist device

|                                                      | Overall Cohort<br>N=3,077 |
|------------------------------------------------------|---------------------------|
| <b>Demographics</b>                                  |                           |
| Median age (IQR), years                              | 64 (18.0)                 |
| Female, n (%)                                        | 890 (29%)                 |
| Ratio of Race/ethnicity at zip code level, mean (SD) |                           |
| Black                                                | 0.09 (0.2)                |
| Hispanic                                             | 0.12 (0.2)                |
| White                                                | 0.79 (0.2)                |
| Health plan type, n (%)                              |                           |
| HMO                                                  | 546 (18%)                 |
| PPO                                                  | 2,218 (72%)               |
| Other                                                | 318 (10%)                 |
| Geographic region, n (%)                             |                           |
| Northeast                                            | 468 (15%)                 |
| Midwest                                              | 890 (29%)                 |
| South                                                | 905 (29%)                 |
| West                                                 | 716 (23%)                 |
| Mean socioeconomic status index, (%)*                | 54.3 (5.8)                |
| Year of index admission, n (%)                       |                           |
| 2015                                                 | 505 (16%)                 |
| 2016                                                 | 593 (19%)                 |
| 2017                                                 | 625 (20%)                 |
| 2018                                                 | 540 (18%)                 |
| 2019                                                 | 629 (20%)                 |
| 2020 (up to 4/30)                                    | 185 (6%)                  |
| Cardiac arrest, n (%)**                              | 986 (32%)                 |
| <b>Comorbidities</b>                                 |                           |
| Charlson comorbidity index score, (median, IQR)      | 1 (2.0)                   |
| Hypertension                                         | 1642 (53%)                |
| Dyslipidemia                                         | 1290 (42%)                |
| Diabetes mellitus                                    | 887 (29%)                 |
| Tobacco use                                          | 434 (14%)                 |
| Obesity                                              | 257 (8%)                  |
| Previous PCI                                         | 65 (2%)                   |
| Previous CABG                                        | 10 (0%)                   |
| Heart failure                                        | 427 (14%)                 |
| Atrial fibrillation                                  | 242 (8%)                  |
| Cerebrovascular disease                              | 272 (9%)                  |
| Peripheral vascular disease                          | 381 (12%)                 |
| Chronic lung disease                                 | 338 (11%)                 |
| Cancer                                               | 255 (8%)                  |

|                        |           |
|------------------------|-----------|
| Chronic kidney disease | 425 (14%) |
|------------------------|-----------|

\*Based on zip code

\*\*Upon first medical contact to the day of device implantation

IABP = Intra-aortic balloon pump; LVAD = left ventricular assist device; IQR = Interquartile range; SD = Standard deviation; PCI = Percutaneous coronary intervention; CABG = Coronary artery bypass grafting

Groups with less than 10 patients are shown as “<10” to preserve patient confidentiality

**eTable 3.** Healthcare utilization preceding index hospitalization for acute myocardial infraction complicated by cardiogenic shock

|                                          |                 |                                |                   | Propensity-Matched Cohort |                                |                                    |
|------------------------------------------|-----------------|--------------------------------|-------------------|---------------------------|--------------------------------|------------------------------------|
|                                          | IABP<br>N=2,234 | Intravascular<br>LVAD<br>N=867 | <i>P</i><br>Value | IABP<br>N=820             | Intravascular<br>LVAD<br>N=820 | Standardized<br>Mean<br>Difference |
| <b>Healthcare utilization, mean (SD)</b> |                 |                                |                   |                           |                                |                                    |
| Number of inpatient visits               | 0.19 (0.6)      | 0.25 (0.7)                     | 0.02              | 0.23 (0.7)                | 0.24 (0.7)                     | 0.01                               |
| Number of ER visits                      | 0.19 (0.5)      | 0.23 (0.9)                     | 0.25              | 0.19 (0.6)                | 0.19 (0.5)                     | 0                                  |
| Number of office visits                  | 3.9 (4.5)       | 4.3 (4.6)                      | 0.02              | 4.1 (4.5)                 | 4.2 (4.5)                      | 0.03                               |
| Mean total healthcare costs              | \$9,158         | \$14,260                       | 0.02              | \$9,921                   | \$12,746                       | 0.04                               |

IABP = Intra-aortic balloon pump; LVAD = left ventricular assist device; SD = Standard deviation; ER = Emergency Room

**eTable 4.** Clinical outcomes at 30-days and 1-year in the propensity matched cohort

|                             | IABP  | Intravascular LVAD | Odds Ratio/ Hazard Ratio<br>95% CI | <i>P</i> value |
|-----------------------------|-------|--------------------|------------------------------------|----------------|
| <b>Up to 30-days</b>        | N=773 | N=771              |                                    |                |
| Severe bleeding             | 112   | 147                | 1.35 (1.04-1.76)                   | 0.027          |
| RRT                         | 54    | 94                 | 1.88 (1.30-2.73)                   | 0.001          |
| Stroke                      | 44    | 52                 | 1.14 (0.76-1.73)                   | 0.53           |
| Repeat<br>revascularization | 12    | <10                | 0.58 (0.23-1.48)                   | 0.26           |
| Death                       | 219   | 309                | 1.71 (1.37-2.13)                   | <0.001         |
| <b>Up to 1-year</b>         | N=551 | N=579              |                                    |                |
| Severe bleeding             | 134   | 172                | 1.36 (1.05-1.75)                   | 0.018          |
| RRT                         | 60    | 105                | 1.95 (1.35-2.83)                   | 0.001          |
| Stroke                      | 56    | 60                 | 1.21 (0.81-1.81)                   | 0.36           |
| Repeat<br>revascularization | 57    | 44                 | 0.86 (0.51-1.47)                   | 0.59           |
| Death                       | 248   | 341                | 1.44 (1.21-1.71)                   | 0.001          |

IABP = Intra-aortic balloon pump; LVAD = left ventricular assist device; CI = Confidence interval; RRT = Renal replacement therapy



**eTable 5.** Mean total medical costs for patients undergoing percutaneous coronary intervention for acute myocardial infarction complicated by cardiogenic shock in the propensity-matched cohort

| Mean Total Medical Costs      | IABP<br>N=817 | Intravascular LVAD<br>N=817 | Mean Difference<br>(95% CI)    | <i>P</i> value |
|-------------------------------|---------------|-----------------------------|--------------------------------|----------------|
| In-Hospital                   | \$100,750     | \$161,029                   | \$60,279 (\$43,245-\$79,328)   | <0.001         |
| 30-Day                        | \$91,861      | \$143,541                   | \$51,680 (\$31,488, \$75,178)  | <0.001         |
| 30-Day Amongst Survivors Only | \$104,416     | \$162,605                   | \$58,189 (\$31,349, \$90,335)  | <0.001         |
| 1-Year                        | \$115,029     | \$161,638                   | \$46,609 (\$22,126, \$75,461)  | 0.004          |
| 1-Year Amongst Survivors Only | \$142,426     | \$217,475                   | \$75,049 (\$37,553, \$120,357) | <0.001         |

IABP = Intra-aortic balloon pump; LVAD = left ventricular assist device; CI = Confidence interval

**eTable 6.** Sensitivity analyses including our propensity score as a covariate, including patients also receiving extracorporeal membrane oxygenation, and exclusion of patients who had cardiac arrest

|                              | PS as covariate<br>N=3,077 |              |                | Sensitivity (including ECMO)<br>N=893 each group |              |                | Exclude cardiac arrest<br>N=512 each group |              |                |
|------------------------------|----------------------------|--------------|----------------|--------------------------------------------------|--------------|----------------|--------------------------------------------|--------------|----------------|
| <b>Index hospitalization</b> | Odds ratio                 | 95% CI       | <i>P</i> value | Odds ratio                                       | 95% CI       | <i>P</i> value | Odds ratio                                 | 95% CI       | <i>P</i> value |
| Severe bleeding              | 1.31                       | (1.05, 1.63) | 0.0149         | 1.39                                             | (1.11, 1.75) | 0.005          | 1.16                                       | (0.85, 1.57) | 0.35           |
| Death                        | 2.01                       | (1.66, 2.43) | <0.001         | 1.76                                             | (1.43, 2.16) | <0.001         | 2.00                                       | (1.49, 2.69) | <0.001         |
| <b>Up to 30-days</b>         | Odds ratio                 | 95% CI       | <i>P</i> value | Odds ratio                                       | 95% CI       | <i>P</i> value | Odds ratio                                 | 95% CI       | <i>P</i> value |
| Severe bleeding              | 1.21                       | (0.97, 1.52) | 0.095          | 1.32                                             | (1.02, .69)  | 0.03           | 1.15                                       | (0.83, 1.60) | 0.4            |
| RRT                          | 1.89                       | (1.40,2.55)  | <0.001         | 1.68                                             | (1.21, 3.34) | 0.0018         | 2.00                                       | (1.24, 3.23) | 0.0047         |
| Death                        | 2.09                       | (1.72, 2.54) | <0.001         | 1.69                                             | (1.37, 2.09) | <0.001         | 2.28                                       | (1.67, 3.10) | <0.001         |
| <b>Up to 1-year</b>          | Hazard ratio               | 95% CI       | <i>P</i> value | Hazard ratio                                     | 95% CI       | <i>P</i> value | Hazard ratio                               | 95% CI       | <i>P</i> value |
| Severe bleeding              | 1.26                       | (1.04, 1.51) | 0.016          | 1.31                                             | (1.05, 1.64) | 0.019          | 1.13                                       | (0.84, 1.52) | 0.41           |
| RRT                          | 1.97                       | (1.51,2.56)  | <0.001         | 1.86                                             | (1.35, 2.56) | 0.0001         | 2.20                                       | (1.37, 3.53) | 0.001          |
| Death                        | 1.62                       | (1.41, 1.86) | <0.001         | 1.50                                             | (1.27, 1.77) | <0.001         | 1.81                                       | (1.42, 2.30) | <0.001         |

CI = Confidence interval; ECMO = Extracorporeal membrane oxygenation; RRT = Renal replacement therapy

**eTable 7.** Landmark analysis for patients who survived their index admission up to 1-year in the propensity matched cohort

|                          | IABP<br>N=481 | Intravascular LVAD<br>N=481 | Hazard Ratio<br>95% CI | <i>P</i> value |
|--------------------------|---------------|-----------------------------|------------------------|----------------|
| Severe bleeding          | 95 (19.8%)    | 126 (26.2%)                 | 1.37 (1.03-1.82)       | 0.032          |
| Stroke                   | 38 (7.9%)     | 48 (10.0%)                  | 1.27 (0.81-1.98)       | 0.31           |
| Repeat revascularization | 50 (10.4%)    | 41 (8.5%)                   | 0.89 (0.55-1.44)       | 0.62           |
| Incident RRT             | 27 (5.6%)     | 56 (11.6%)                  | 2.20 (1.37-3.53)       | 0.001          |
| Death                    | 27 (5.6%)     | 42 (8.7%)                   | 1.81 (1.06-3.08)       | 0.029          |

IABP = Intra-aortic balloon pump; LVAD = left ventricular assist device; CI = Confidence interval; RRT = Renal replacement therapy

**eTable 8.** Falsification endpoints among propensity-matched patients receiving an intravascular left ventricular assist device versus intra-aortic balloon pump

| Falsification endpoint, n (%) | IABP<br>N=817 | Intravascular<br>LVAD<br>N=817 | OR (95% CI)      | <i>P</i> value |
|-------------------------------|---------------|--------------------------------|------------------|----------------|
| Pneumonia                     | 113 (14%)     | 119 (15%)                      | 1.06 (0.81-1.40) | 0.67           |
| Composite                     | 58 (7%)       | 66 (8%)                        | 1.15 (0.80-1.65) | 0.46           |
| Diarrhea                      | 17 (2%)       | 24 (3%)                        | 1.41 (0.76-2.63) | 0.28           |
| Cellulitis                    | 18 (2%)       | 17 (2%)                        | 0.94 (0.49-1.83) | 0.87           |
| Deep vein thrombosis          | <10 (0%)      | <10 (0%)                       | 0.50 (0.05-5.51) | 0.57           |
| Intestinal obstruction        | 24 (3%)       | 267 (3%)                       | 1.13 (0.65-1.95) | 0.67           |
| Osteomyelitis                 | <10 (0%)      | <10 (0%)                       | 0.75 (0.17-3.35) | 0.71           |

IABP = Intra-aortic balloon pump; LVAD = left ventricular assist device; OR = Odds ratio; CI = Confidence interval

Groups with less than 10 patients are shown as “<10” to preserve patient confidentiality.

**eFigure.** Kaplan-Meier curves for 1-year bleeding (A), renal replacement therapy (B), stroke (C) and repeat revascularization (D) among propensity-matched patients receiving an intravascular left ventricular assist device versus intra-aortic balloon pump

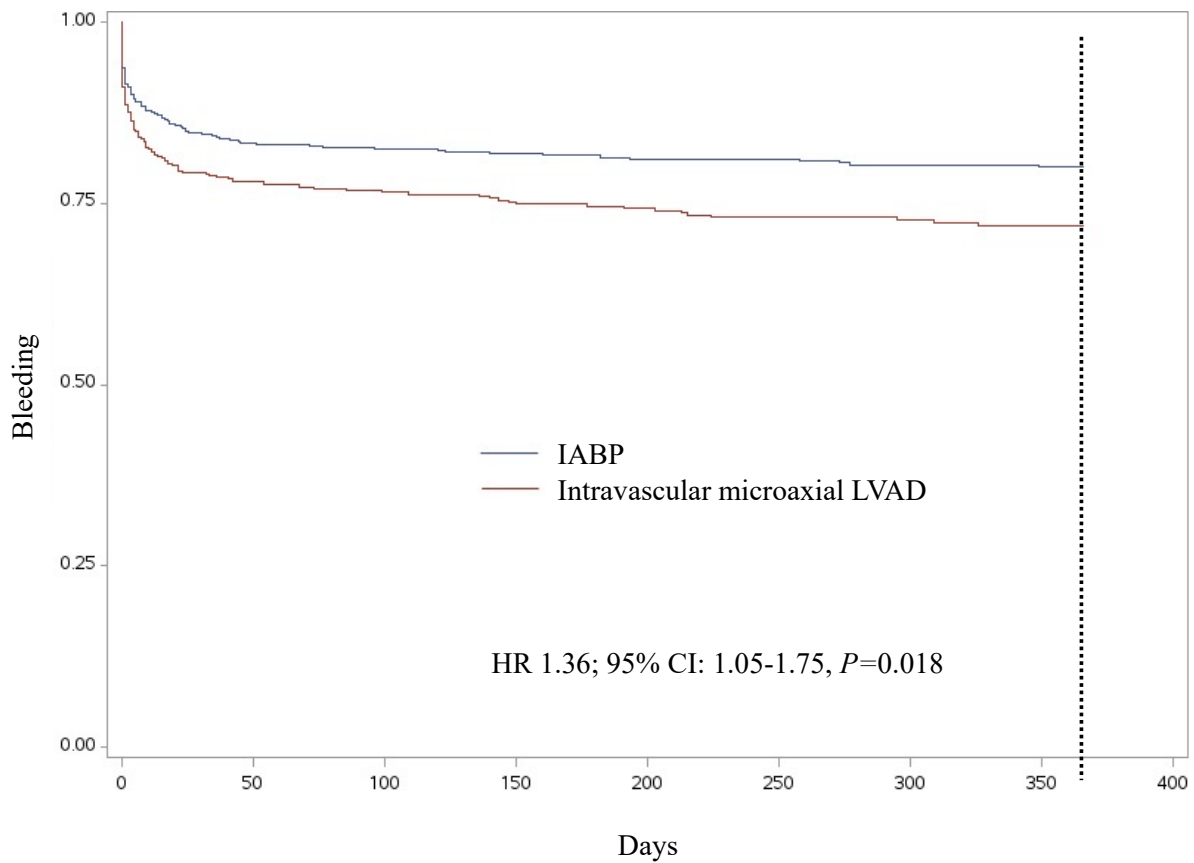

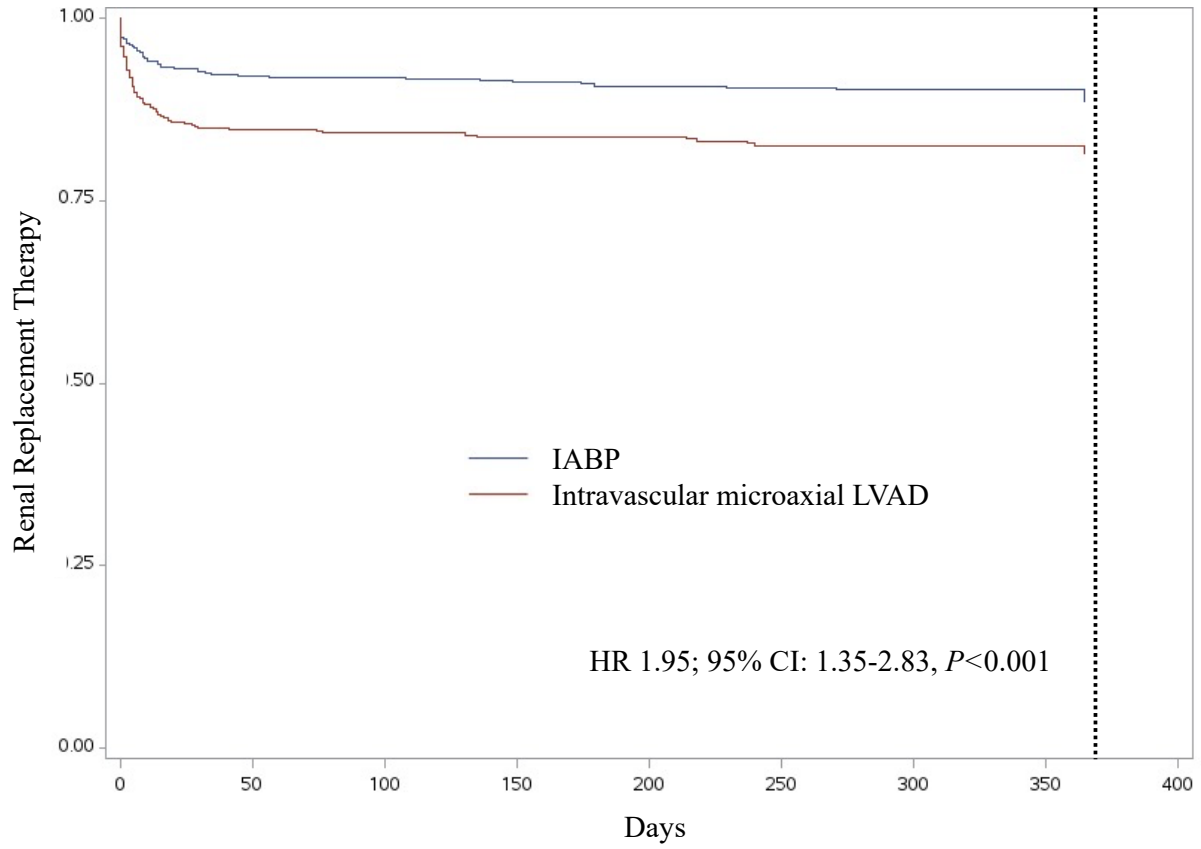

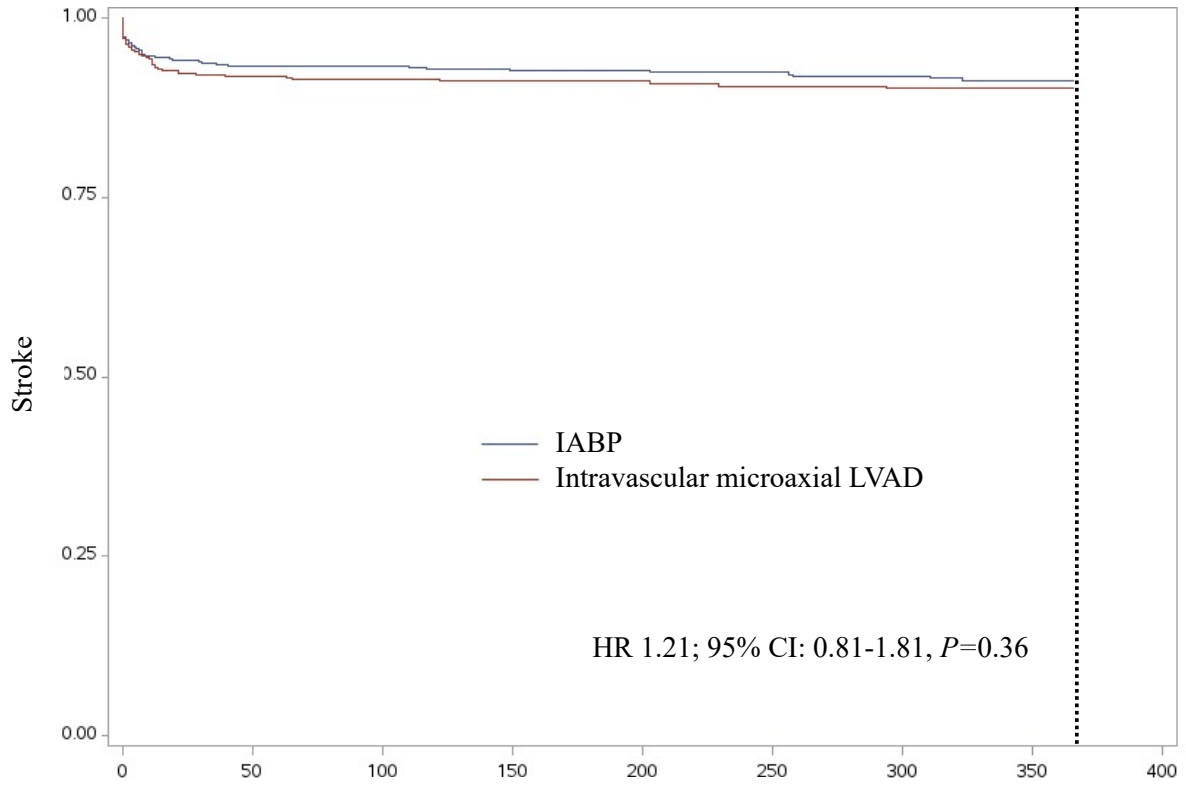

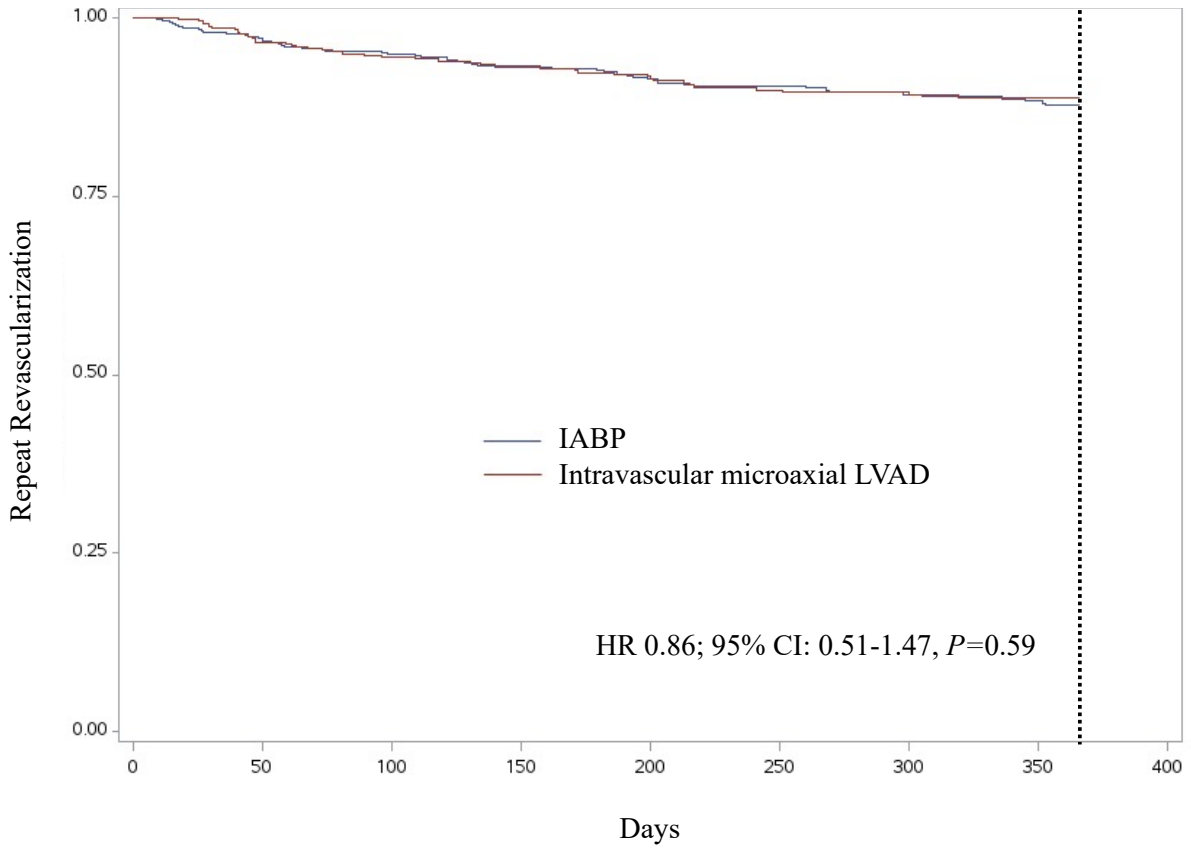

Supplement: jamainternmed-e222735-s001.pdf [file jamainternmed-e222735-s001.pdf]
